# Supplementary material for: A gas-selective Zn-MOF exhibits selective sensing of Fe3+ ions by doping with Tb3+
Source: Royal Society of Chemistry journal article supplement (doi:10.1039/d3dt02721j), 2023-01-01
Supplement: d3dt02721j1.pdf [file d3dt02721j1.pdf]

## Electronic Supporting Information

### The gas-selective Zn-MOF exhibits selective sensing of Fe<sup>3+</sup> ions by doping with Tb<sup>3+</sup>

Zhi-Gang Wang,<sup>\*,a,b</sup> Tao Ding,<sup>b</sup> Jie Fei,<sup>\*,a</sup>

<sup>a</sup> School of Materials, Northwestern Polytechnical University, Xi'an 710048, P. R China.

<sup>b</sup> School of Environmental and Chemical Engineering, Xi'an Polytechnic University, Xi'an 710048, P. R China.

**Table S1** Selected Bond Length (Å) and Angles (°) for Zn-MOF and Tb@Zn-MOF

| <b>Zn-MOF</b>       |            |                     |            |
|---------------------|------------|---------------------|------------|
| Zn(1)-O(3)#1        | 2.072(6)   | Zn(1)-O(3)#2        | 2.072(6)   |
| Zn(1)-O(5)#2        | 2.028(6)   | Zn(1)-O(5)#1        | 2.028(6)   |
| Zn(1)-N(1)          | 1.969(8)   | Zn(2)-N(3)          | 1.998(6)   |
| Zn(2)-N(6)#3        | 2.013(6)   | Zn(2)-N(3)          | 1.998(6)   |
| Zn(2)-O(7)          | 2.004(9)   | Zn(2)-O(1)          | 2.004(9)   |
| Zn(3)-O(4)          | 2.002(6)   | Zn(3)-O(4)#4        | 2.002(6)   |
| Zn(3)-O(6)          | 2.096(6)   | Zn(3)-O(6)#4        | 2.096(6)   |
| Zn(3)-N(4)          | 1.976(9)   | O(5)#1-Zn(1)-O(3)#2 | 88.5(3)    |
| O(5)#2-Zn(1)-O(3)#2 | 87.5(3)    | O(5)#1-Zn(1)-O(3)#1 | 87.5(3)    |
| O(5)#1-Zn(1)-O(3)#1 | 87.8(3)    | O(5)#2-Zn(1)-O(3)#2 | 87.8(3)    |
| O(5)#2-Zn(1)-O(3)#1 | 88.5(3)    | O(5)#2-Zn(1)-O(5)#1 | 158.7(3)   |
| N(1)-Zn(1)-O(3)#2   | 100.71(16) | N(1)-Zn(1)-O(3)#1   | 100.71(16) |
| N(1)-Zn(1)-O(5)#1   | 100.64(15) | N(1)-Zn(1)-O(5)#2   | 100.64(15) |

|                                                                                                                                                                                   |            |                     |            |
|-----------------------------------------------------------------------------------------------------------------------------------------------------------------------------------|------------|---------------------|------------|
| N(3)-Zn(2)-N(6)#3                                                                                                                                                                 | 106.7(3)   | N(3)-Zn(2)-O(1)     | 103.2(3)   |
| N(3)-Zn(2)-O(7)                                                                                                                                                                   | 109.9(3)   | O(1)-Zn(2)-N(6)#3   | 109.9(3)   |
| O(1)-Zn(2)-O(7)                                                                                                                                                                   | 123.0(4)   | O(7)-Zn(2)-N(6)#3   | 103.4(3)   |
| O(4)-Zn(3)-O(6)#4                                                                                                                                                                 | 158.8(3)   | O(4)#4-Zn(3)-O(6)   | 87.6(3)    |
| O(4)-Zn(3)-O(6)#4                                                                                                                                                                 | 87.6(3)    | O(4)#4-Zn(3)-O(6)#4 | 88.5(3)    |
| O(4)-Zn(3)-O(6)                                                                                                                                                                   | 88.5(3)    | O(6)#4-Zn(3)-O(6)   | 158.3(3)   |
| N(4)-Zn(3)-O(4)#4                                                                                                                                                                 | 100.60(16) | N(4)-Zn(3)-O(4)     | 100.60(16) |
| N(4)-Zn(3)-O(6)                                                                                                                                                                   | 100.84(15) | N(4)-Zn(3)-O(6)#4   | 100.84(16) |
| Symmetrical codes: #1 -x+1/2,-y+3/2,-z+1/2;#2 x-1/2,y,-z+1/2;#3 x-1/2,-y+3/2,-z+1;#4 -x+1,-y+3/2,z+0;#5 -x+0,-y+3/2,z+0;#6 -x+1/2,y-1/2,z;#7 x+1/2,-y+3/2,-z+1;#8 -x+1/2,y+1/2,z. |            |                     |            |
| <b>Tb@Zn-MOF</b>                                                                                                                                                                  |            |                     |            |
| N(4)-Zn(1)                                                                                                                                                                        | 1.982(4)   | N(5)-Zn(2)          | 1.983(6)   |
| O(1)-Zn(1)                                                                                                                                                                        | 1.948(5)   | O(4)-Zn(2)#2        | 2.058(4)   |
| O(5)-Zn(2)#3                                                                                                                                                                      | 2.045(4)   | O(1)#6-Zn(1)-O(1)   | 109.4(3)   |
| O(1)#6-Zn(1)-N(4)                                                                                                                                                                 | 102.46(19) | O(1)-Zn(1)-N(4)     | 116.5(2)   |
| O(1)#6-Zn(1)-N(4)#6                                                                                                                                                               | 116.5(2)   | O(1)-Zn(1)-N(4)#6   | 102.47(19) |
| N(4)-Zn(1)-N(4)#6                                                                                                                                                                 | 110.1(3)   | N(5)-Zn(2)-O(5)#7   | 107.14(19) |
| N(5)-Zn(2)-O(5)#8                                                                                                                                                                 | 107.14(19) | O(5)#7-Zn(2)-O(5)#8 | 86.4(3)    |
| O(5)#7-Zn(2)-O(4)#2                                                                                                                                                               | 156.83(18) | O(5)#8-Zn(2)-O(4)#2 | 88.3(2)    |
| N(5)-Zn(2)-O(4)#9                                                                                                                                                                 | 95.98(19)  | O(5)#7-Zn(2)-O(4)#9 | 88.3(2)    |
| O(5)#8-Zn(2)-O(4)#9                                                                                                                                                               | 156.83(18) | O(4)#2-Zn(2)-O(4)#9 | 87.7(3)    |
| Symmetry codes: #1 x,-y+1,z;#2 -x+3/2,-y+3/2,-z+1;#3 x+1/2,y+1/2,z+1;#4 -x+1,-y+1,-z;#5 x,-y+2,z;#6 -x+1,y,-z+1;#7 x-1/2,y-1/2,z-1;#8 x-1/2,-y+3/2,z-1;#9 -x+3/2,y-1/2,-z+1.      |            |                     |            |

**Table S2** Results of the ICP-OES analyses obtained for **Tb@Zn-MOF**

| Test element | Sample quality (g) | C <sub>0</sub> (mg/L) | Sample element content C <sub>x</sub> (mg/kg) | Sample element content W (%) |
|--------------|--------------------|-----------------------|-----------------------------------------------|------------------------------|
| Tb           | 0.1154             | 1.841                 | 3988                                          | 0.40                         |
| Zn           | 0.1154             | 5.897                 | 12774                                         | 1.28                         |

**Table S3** Results of the EDS analyses obtained for **Tb@Zn-MOF**

| Element | Graph 1            | Graph 2 | Graph 3 |
|---------|--------------------|---------|---------|
|         | W <sub>t</sub> (%) |         |         |
| Zn      | 25.81              | 33.66   | 32.89   |
| Tb      | 0.35               | 1.01    | 1.39    |

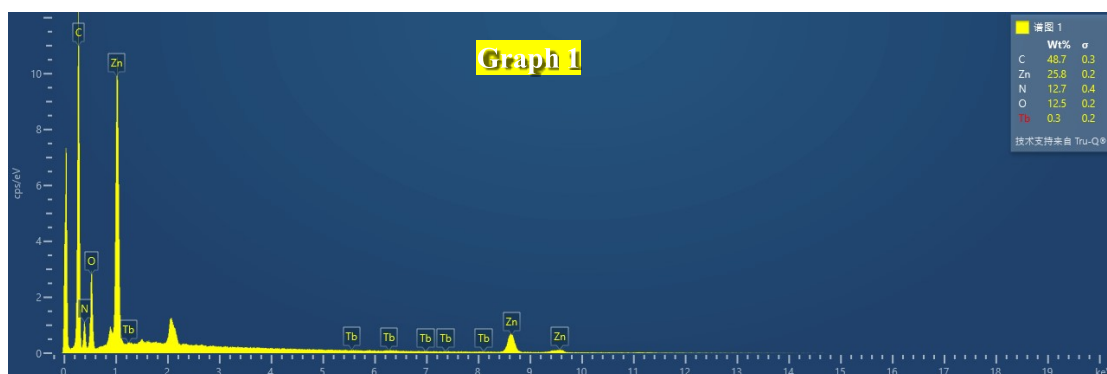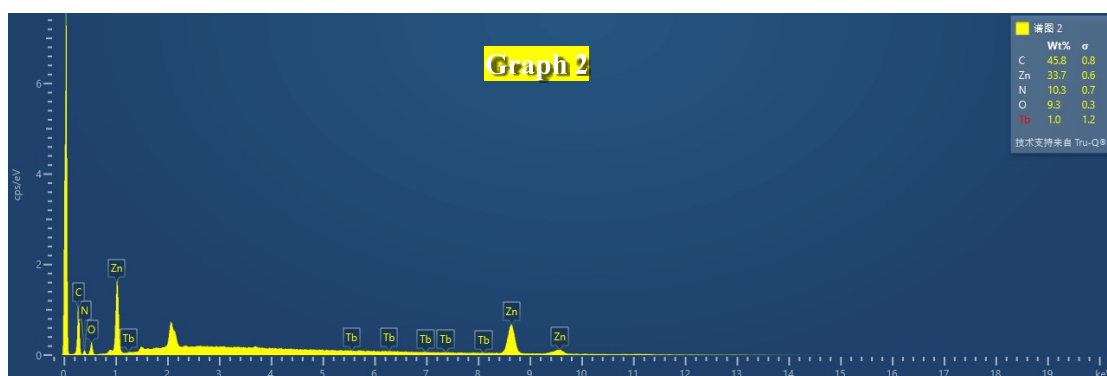

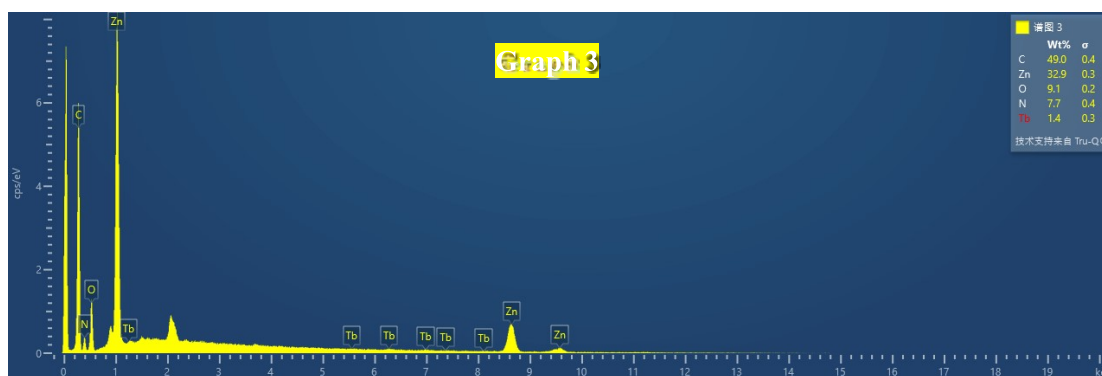

**Table S4** A comparison of various MOFs materials used for selective adsorption for  $C_2H_2$  and  $CO_2$  over  $CH_4$ .

| MOFs materials                                                                                             | IAST calculated selectivity |             | Ref. |
|------------------------------------------------------------------------------------------------------------|-----------------------------|-------------|------|
|                                                                                                            | $C_2H_2/CH_4$               | $CO_2/CH_4$ |      |
| ZJNU-98                                                                                                    |                             | 5.7         | 1b   |
| ZJNU-81                                                                                                    |                             | 5.46        | 2b   |
| Zn-MOF                                                                                                     | 11.87                       | 8.18        | 5a   |
| $\{[Co_3(L)(OH)_2(H_2O)_4] \cdot 2DMF \cdot 2H_2O\}_n$                                                     | 13                          | 4           | 9    |
| $\{[Cu_4(L)_2(H_2O)_4] \cdot 4DMF \cdot 8H_2O\}_n$                                                         |                             | 3.2         | 13a  |
| $[(CH_3)_2NH_2][Zn_{1.5}(\mu_3-O)_{0.5}(F-tzba)_{1.25}(bpy)_{0.25}(\mu_2-F)_{0.5}] \cdot 2DMF \cdot 2H_2O$ | 14.4                        | 4.2         | 14a  |
| ZJNU-63                                                                                                    | 13.1                        | 3.5         | 14b  |
| $\{[Co_6(\mu_3-OH)_4(Ina)_8](H_2O)_{10}(DMA)_2\}_n$                                                        | 9.6                         |             | 14c  |
| ZJU-16a                                                                                                    | 7.5                         |             | 14d  |
| MOF-505                                                                                                    | ~8.9                        |             | 15a  |
| $Zn_2(TCPP)(DPB)$                                                                                          | 12.1                        |             | 15b  |
| SNNU-5-In                                                                                                  | 10                          | 3.9         | 15c  |

Zn-MOF

14.48

6.04

This work

**Table S5** Comparison the  $K_{sv}$  of **Tb@Zn-MOF** towards  $Fe^{3+}$  with other materials

| MOFs materials                                    | $K_{sv}$ ( $M^{-1}$ ) | Ref.      |
|---------------------------------------------------|-----------------------|-----------|
| $H_3O[In_3(dcpy)_4(OH)_2] \cdot 3DMF \cdot 4H_2O$ | $4.3 \times 10^3$     | 5b        |
| Eu-MOF                                            | $1.78 \times 10^4$    | 5d        |
| Tb(3+) <b>@Zn-MOF</b>                             | $1.57 \times 10^4$    | 8b        |
| Zn-MOF                                            | $1.9 \times 10^4$     | 16b       |
| Tb-DSOA                                           | $3.54 \times 10^3$    | 17a       |
| $[Tb_4(L)_6(H_2O)_8]$                             | $1.88 \times 10^4$    | 17b       |
| 534-MOF-Tb                                        | $5.51 \times 10^3$    | 17c       |
| Tb-N                                              | $7.93 \times 10^3$    | 19        |
| Tb-F                                              | $1.39 \times 10^4$    | 19        |
| <b>Tb@Zn-MOF</b>                                  | $2.79 \times 10^4$    | This work |

**Fig. S1** The  $L^4$  ligand viewed as two 3-c nodes.

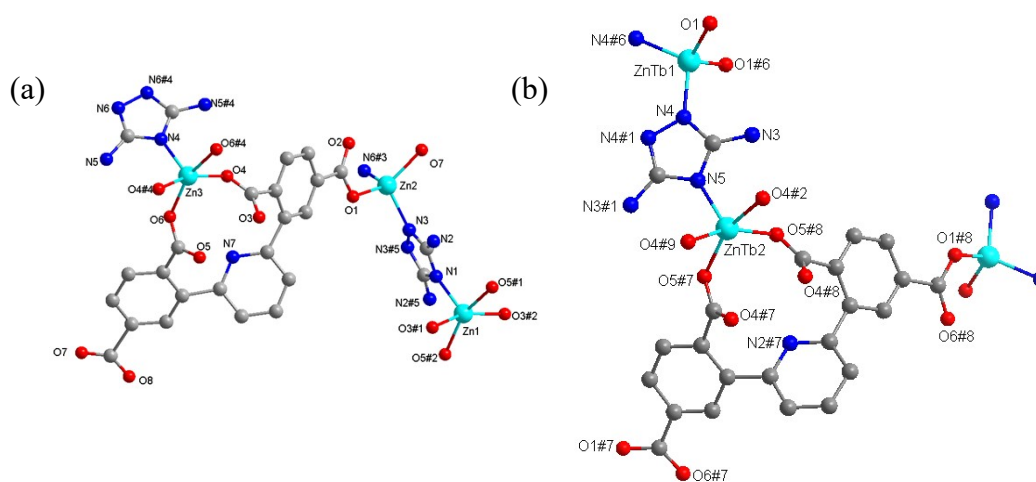

**Fig. S2** Coordination environments of **Zn-MOF** (a) and **Tb@Zn-MOF** (b).

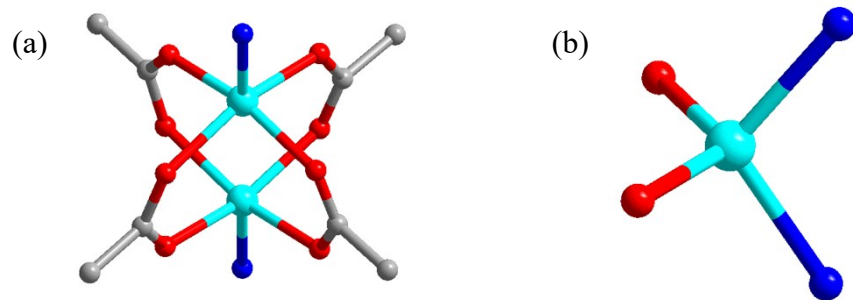

**Fig. S3** [Zn<sub>2</sub>(COO)<sub>4</sub>(N)<sub>2</sub>] cluster (a) and ZnO<sub>2</sub>N<sub>2</sub> cluster (b).

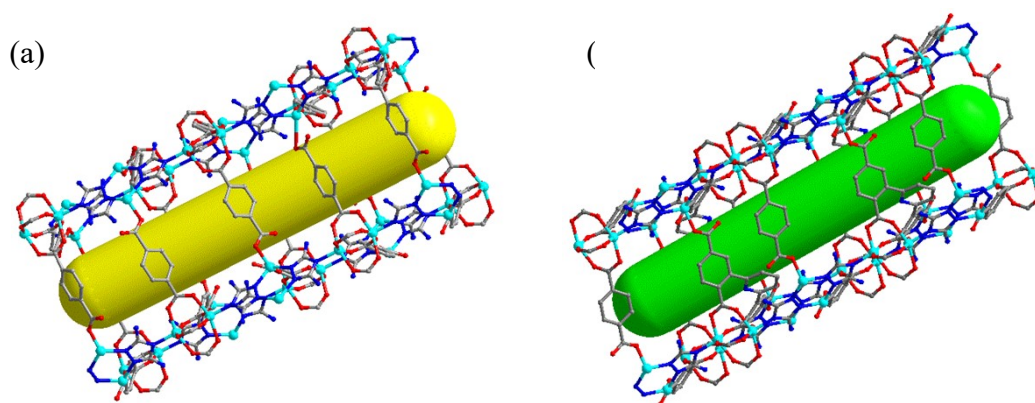

**Fig. S4** The channel of Zn-MOF (a) and Tb@Zn-MOF (b).

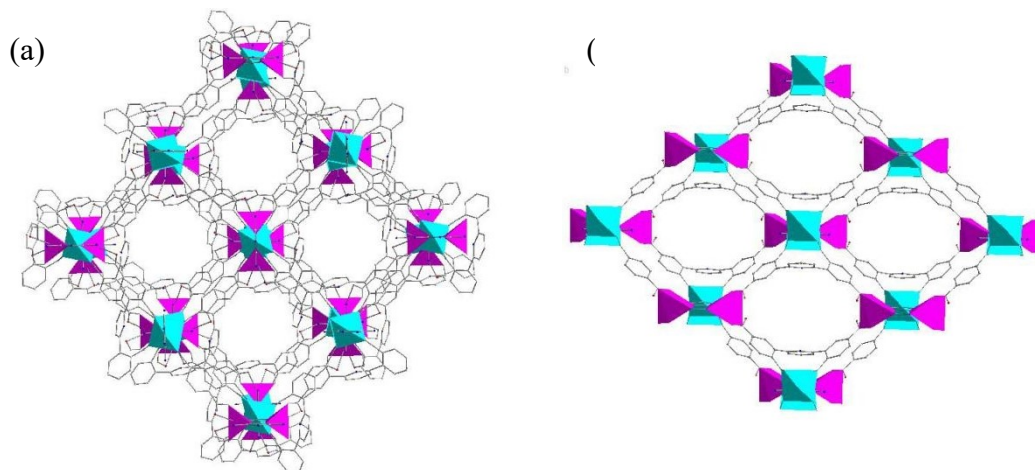

**Fig. S5** The four alternately connected layers in Zn-MOF (a) and the two alternately connected layers in Tb@Zn-MOF (b).

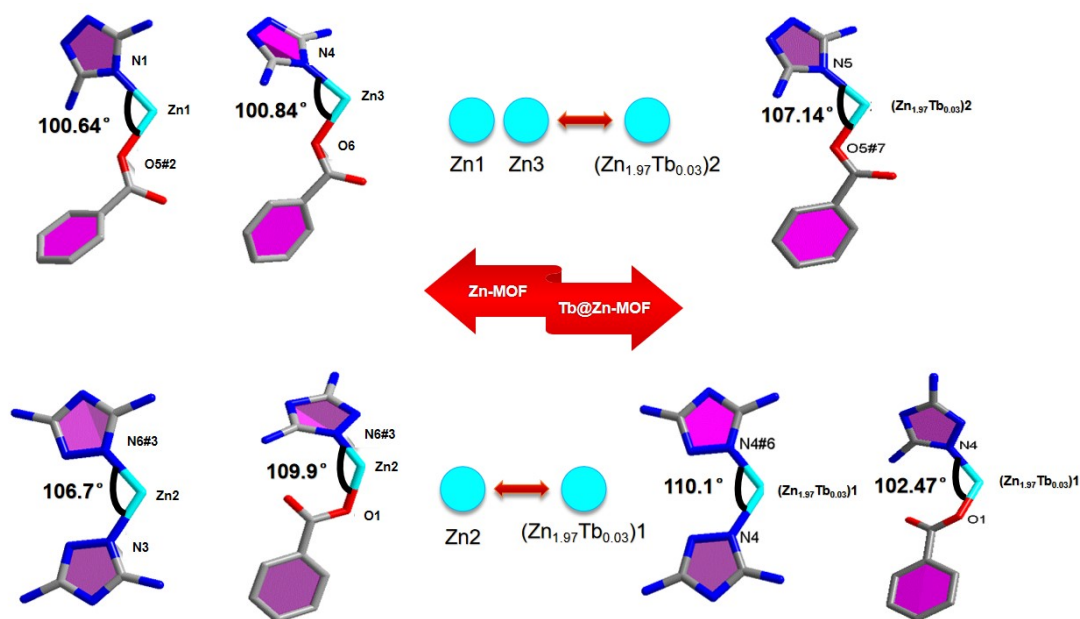

Fig. S6 Coordination angles of Zn(II) ions in Zn-MOF and Tb@Zn-MOF.

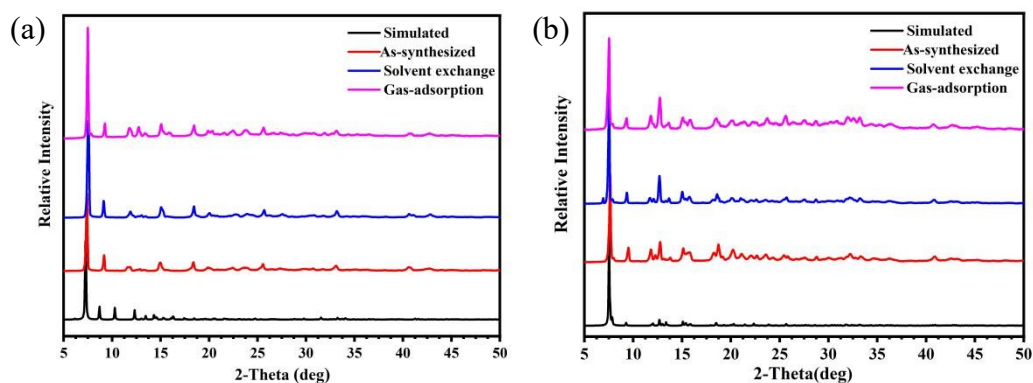

Fig. S7 PXRD patterns for Zn-MOF (a), Tb@Zn-MOF (b): Simulated, as-synthesized, solvent exchange and gas-adsorption samples.

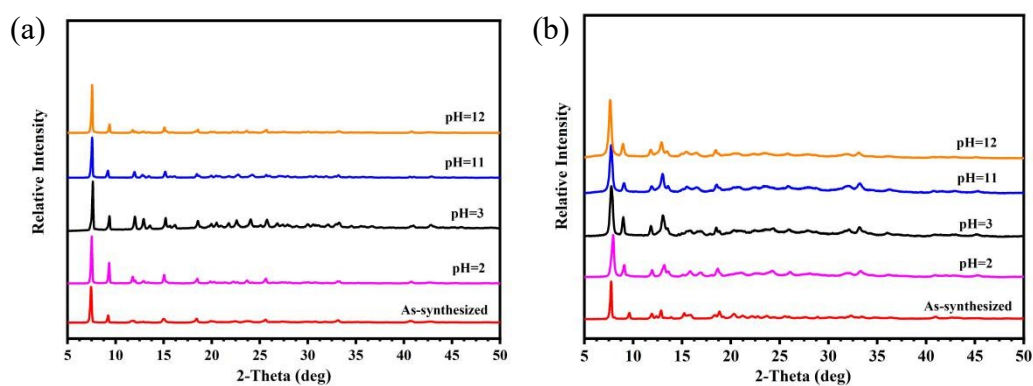

Fig. S8 PXRD patterns for Zn-MOF (a), Tb@Zn-MOF (b) after being soaked in acidic and basic solutions.

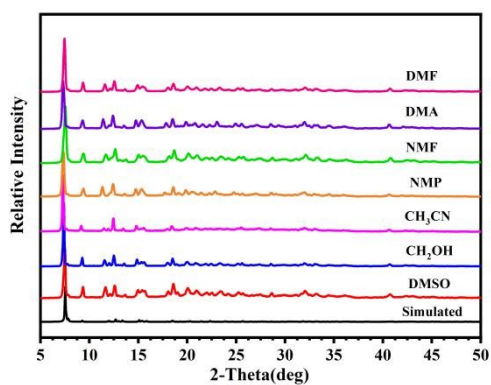

**Fig. S9** PXR D patterns for **Tb@Zn-MOF** after being soaked in different organic solvents.

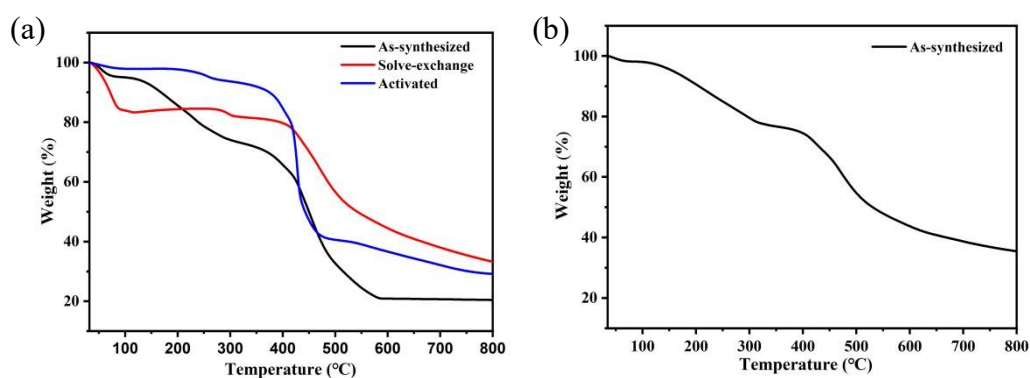

**Fig. S10** TGA for **Zn-MOF** (a) and **Tb@Zn-MOF** (b).

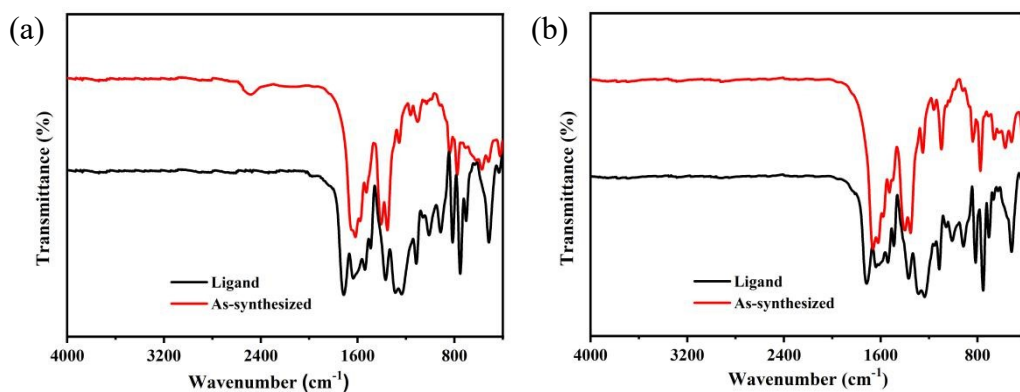

**Fig. S11** IR for ligand and as-synthesized samples: **Zn-MOF** (a) and **Tb@Zn-MOF** (b).

### IAST adsorption selectivity calculation

The experimental isotherm data for pure  $C_2H_2$ ,  $CO_2$  and  $CH_4$  (measured at 298 K) were fitted using a Langmuir-Freundlich (L-F) model

$$q = \frac{a * b * p^c}{1 + b * p^c}$$



Where  $q$  and  $p$  are adsorbed amounts and pressures of component  $i$ , respectively. The adsorption selectivities for binary mixtures of  $C_2H_2/CH_4$  and  $CO_2/CH_4$ , defined by

$$S_{i/j} = \frac{(x_i^* y_j)}{(x_j^* y_i)}$$

were calculated using the Ideal Adsorption Solution Theory (IAST) of Myers and Prausnitz.

Where  $x_i$  the mole fraction of component  $i$  in the adsorbed phase and  $y_i$  is the mole fraction of component  $i$  in the bulk.

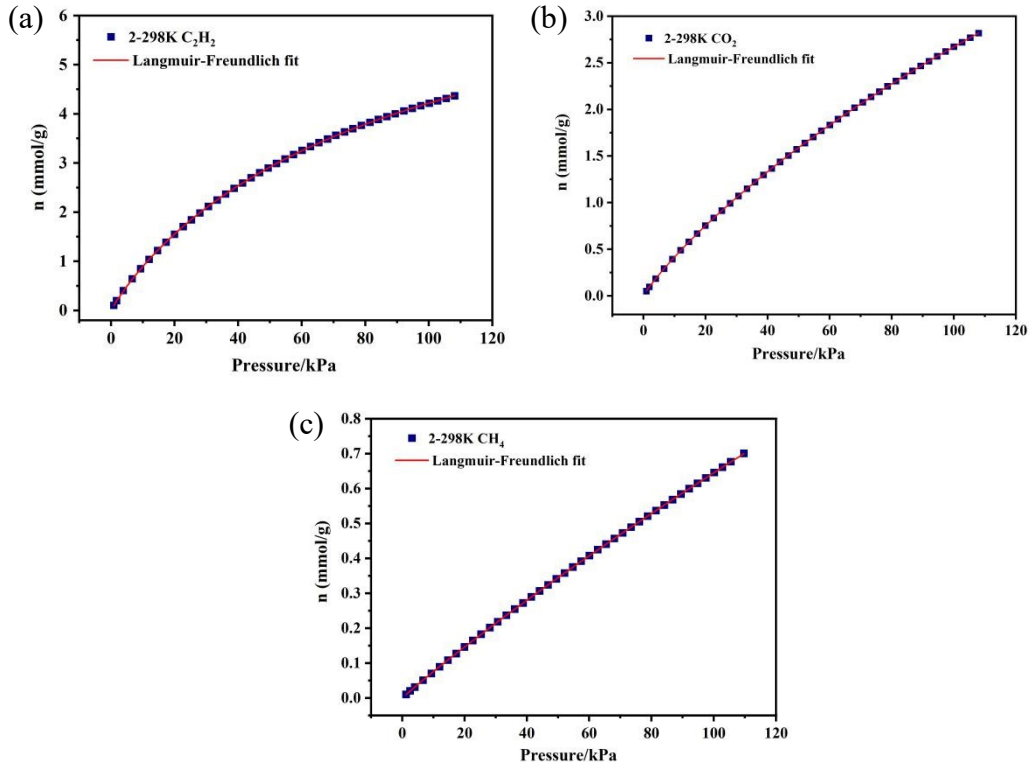

**Fig. S12** (a)  $C_2H_2$  adsorption isotherms of **Zn-MOF** at 298 K with fitting by L-F model:  $a=8.248$ ,  $b=0.014$ ,  $c=0.084$ ,  $\chi^2 = 6.2E-5$ ,  $R^2 = 0.99999$ ; (b)  $CO_2$  adsorption isotherms of **Zn-MOF** at 298 K with fitting by L-F model:  $a=12.59506$ ,  $b=0.0043$ ,  $c=0.102$ ,  $\chi^2=3.2E-7$ ,  $R^2 = 1$ ; (c)  $CH_4$  adsorption isotherms of **Zn-MOF** at 298 K with fitting by L-F model:  $a=7.83267$ ,  $b=0.00106$ ,  $c=0.03594$ ,  $\chi^2 = 2.6E-5$ ,  $R^2 = 1$ .

### Calculation of sorption heat for $C_2H_2$ and $CO_2$ uptakes using Virial 2 model

The above equation was applied to fit the combined  $C_2H_2$  and  $CO_2$  and isotherm data

for desolvated **1a** at 273 and 298 K, where  $P$  is the pressure,  $N$  is the adsorbed amount,  $T$  is the temperature,  $a_i$  and  $b_i$  are virial coefficients, and  $m$  and  $n$  are the number of coefficients used to describe the isotherms.  $Q_{st}$  is the coverage-dependent enthalpy of adsorption and  $R$  is the universal gas constant.

$$\ln P = \ln N + 1/T \sum_{i=0}^m a_i N^i + \sum_{i=0}^n b_i N^i Q_{st} = -R \sum_{i=0}^m a_i N^i$$

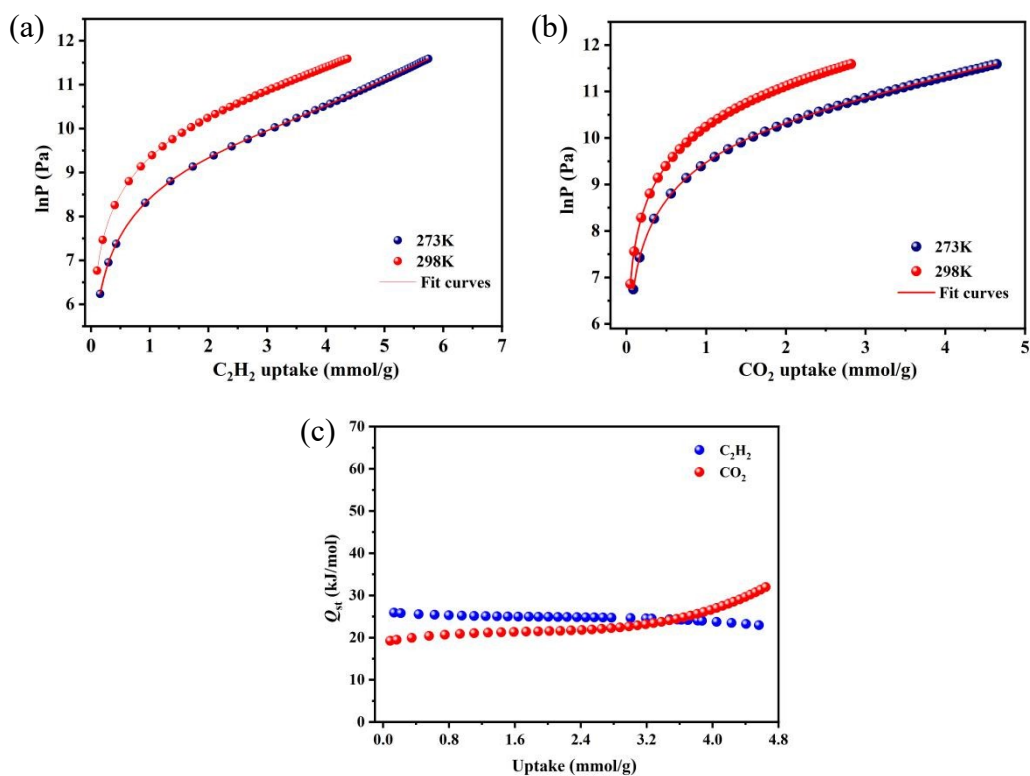

**Fig. S13** (a) Virial analysis of the C<sub>2</sub>H<sub>2</sub> adsorption data at 298 K and 273 K for **Zn-MOF**. Fitting results:  $a_0 = -3136.8988$ ,  $a_1 = 178.38107$ ,  $a_2 = -85.06356$ ,  $a_3 = 16.75777$ ,  $a_4 = -0.59305$ ,  $b_0 = 19.51637$ ,  $b_1 = -0.1369$ ,  $b_2 = 0.14452$ ,  $b_3 = -0.02591$ ,  $\chi^2 = 8.14263E-6$ ,  $R^2 = 0.99999$ ; (b) Virial analysis of the CO<sub>2</sub> adsorption data at 298 K and 273 K for **Zn-MOF**. Fitting results:  $a_0 = -2282.40823$ ,  $a_1 = -400.37189$ ,  $a_2 = 196.78851$ ,  $a_3 = -34.39808$ ,  $a_4 = -1.0745$ ,  $b_0 = 17.53214$ ,  $b_1 = 1.9186$ ,  $b_2 = -0.91172$ ,  $b_3 = 0.17317$ ,  $\chi^2 = 4.32643E-5$ ,  $R^2 = 0.99996$ ; (c) Isothermic heat of C<sub>2</sub>H<sub>2</sub> and CO<sub>2</sub> in **Zn-MOF**.

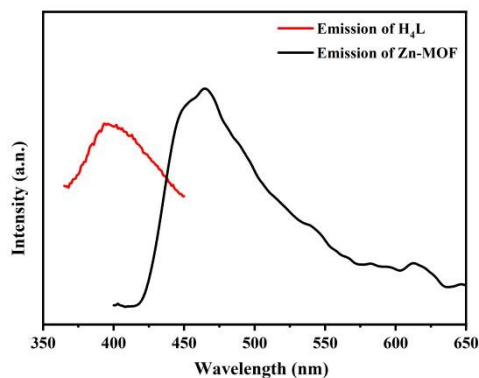

**Fig. S14** The solid-state luminescence spectra of the H<sub>4</sub>L ligand and Zn-MOF.

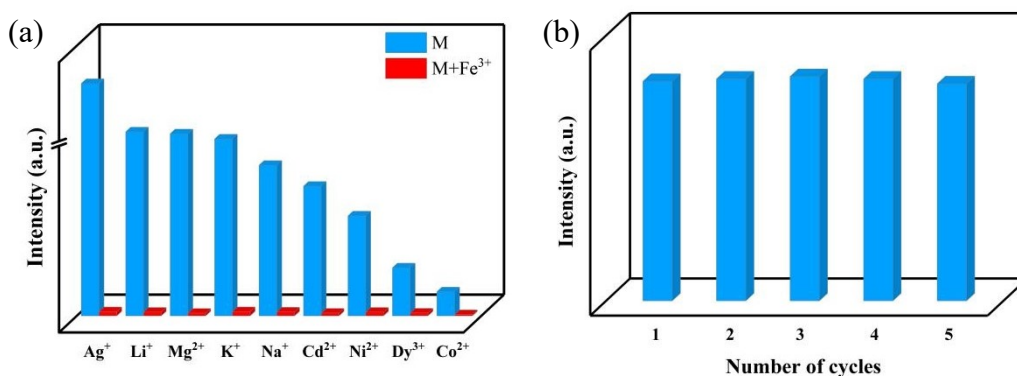

**Fig. S15** (a) Luminescence intensities of Tb@Zn-MOF in different mixed metal solutions; (b) Multiple cycles for the luminescence quenching of Tb@Zn-MOF toward Fe<sup>3+</sup> and recovery after washing by H<sub>2</sub>O for several times.

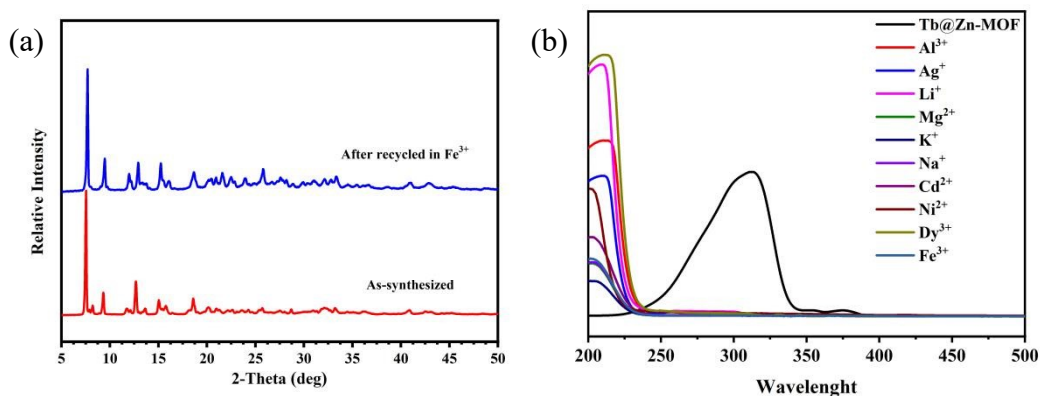

**Fig. S16** (a) PXRD patterns and (b) UV-vis adsorption spectra of M(NO<sub>3</sub>)<sub>x</sub> aqueous and the excitation spectrum of Tb@Zn-MOF.

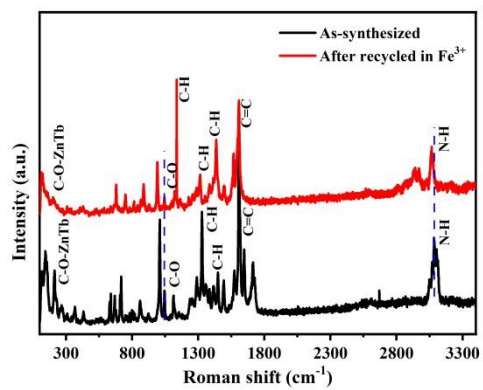

**Fig. S17** Raman spectra of **Tb@Zn-MOF** before and after treatment of  $\text{Fe}^{3+}$ .
